# The Effect of Self-Monitoring of Blood Pressure on Medication Adherence and Lifestyle Factors: A Systematic Review and Meta-Analysis

Benjamin R. Fletcher,<sup>1</sup> Jaime Hartmann-Boyce,<sup>1</sup> Lisa Hinton,<sup>1</sup> and Richard J. McManus<sup>1</sup>

## BACKGROUND

Self-monitoring of blood pressure (SMBP) can contribute to reduced blood pressure in people with hypertension. Potential mediators include increased medication, improved adherence, and changes in lifestyle factors including dietary change and increased physical activity. The objective of this review was to determine the effect of SMBP on medication adherence, medication persistence, and lifestyle factors in people with hypertension.

## METHODS

Electronic bibliographic databases were searched through February 2014 to identify randomized controlled trials that compared SMBP to control/usual care in ambulatory hypertensive patients and reported medication or nonpharmacologic treatment adherence measures.

## RESULTS

Twenty-eight trials with 7,021 participants fulfilled the inclusion criteria. Medication adherence was assessed in 25 trials (89%), dietary outcomes in 8 (29%), physical activity in 6 (21%), and medication persistence in 1 (4%). Blood pressure was assessed in 26 studies (93%). Follow-up ranged from 2 weeks to 12 months. Pooled results of 13 studies demonstrated a small but significant overall effect on medication adherence in favor of SMBP interventions (standardized mean difference 0.21, 95% CI

0.08, 0.34), with moderate heterogeneity ( $I^2 = 43\%$ ). Standardized mean difference was used to express the size of intervention effect in each study relative to the variability observed, and was used to combine the results of studies where different measures of medication adherence were used. Where SMBP interventions had a significant effect on lifestyle factor change, the effect was unlikely to be clinically significant. Pooled results of 11 studies demonstrate a significant overall effect on diastolic blood pressure in favor of SMBP (weighted mean difference  $-2.02$ , 95% CI  $-2.93$ ,  $-1.11$ ), with low heterogeneity ( $I^2 = 0\%$ ). A test for subgroup differences showed no difference when studies were grouped according to whether medication adherence was significantly improved or not.

## CONCLUSIONS

SMBP may contribute to improvements in medication adherence in hypertensives. However, evidence for the effect of SMBP on lifestyle change and medication persistence is scarce, of poor quality, and suggests little clinically relevant benefit.

**Keywords:** adherence; blood pressure; hypertension; meta-analysis; non-pharmacologic; self-monitoring.

doi:10.1093/ajh/hpv008

Self-monitoring of blood pressure (SMBP) leads to reduced blood pressure (BP) in people with hypertension, but how this change occurs is not well understood.<sup>1-3</sup> Potential explanations include pharmacological (increased medication, better adherence) or nonpharmacological (diet, alcohol, exercise, weight loss) mediators. Understanding which mediating factors are important could allow optimization of future interventions.

Around 25% of patients initiated on hypertensive medication fail to fill their first prescription.<sup>4</sup> In the first year of anti-hypertensive treatment, patients on average have possession of medication for 50% of the time, and only 20% have sufficiently high adherence to achieve any benefit.<sup>5</sup> Improving adherence is therefore a key target for behavioral interventions. Lifestyle change is another target as it has been estimated that diet and weight loss can be at least as effective as single drug therapy at reducing BP.<sup>6</sup>

A systematic review published in 2006 found that 6 of 11 included trials detected a statistically significant improvement in adherence to antihypertensive medication from SMBP.<sup>7</sup> Limited evidence from qualitative research suggests that SMBP can influence compliance with diet and exercise regimes.<sup>8,9</sup>

The primary objectives of this review were to synthesize the literature to determine the effect of SMBP on medication adherence, medication persistence, and lifestyle factors in people with hypertension.

## METHODS

### Information sources and study selection

Electronic databases (DARE, Cochrane Database of Systematic Reviews, MEDLINE, EMBASE, CINAHL,

Correspondence: Benjamin R. Fletcher ([benjamin.fletcher@phc.ox.ac.uk](mailto:benjamin.fletcher@phc.ox.ac.uk)).

Initially submitted December 5, 2014; date of first revision December 22, 2014; accepted for publication January 16, 2015; online publication February 26, 2015.

<sup>1</sup>Nuffield Department of Primary Care Health Sciences, University of Oxford, Oxford, UK.

© American Journal of Hypertension, Ltd 2015. All rights reserved. For Permissions, please email: [journals.permissions@oup.com](mailto:journals.permissions@oup.com)

PsycINFO, Proquest Dissertation, and Theses) were searched from inception to February 2014 to identify randomized trials of interventions including SMBP compared with control groups without SMBP. Ongoing and completed studies without related publication were identified through searches of clinical trial databases (i.e., ClinicalTrials.gov, WHO trials portal, UKHTA, and Current controlled trials).

The search strategy was developed in Medline and translated for use in the other databases (Supplementary Appendix S1). No language or time restrictions were applied. Studies were also identified through citation searches of related reviews and relevant trials, and authors were contacted for further information wherever necessary.<sup>10</sup>

Randomized and quasi-randomized trials were eligible for inclusion if the participants had hypertension, were receiving care in ambulatory/outpatient settings, and if medication adherence and/or lifestyle factor outcomes were available. Two reviewers independently screened the reports for inclusion (B.F., J.H.B.). A protocol was developed and made available on the PROSPERO database prior to commencing the review.<sup>11</sup>

### Data extraction and risk of bias assessment

Data were extracted on setting, demographics, intervention and control characteristics, and outcome measures. Raw unadjusted data were extracted wherever available.

Primary outcomes of interest were antihypertensive medication adherence and persistence, dietary outcomes, alcohol consumption, and physical activity. Medication adherence measures were divided into 4 groups to aid analysis: electronic monitoring, pill counts, pharmacy fill data, and self-reported measures. Secondary outcomes included BP, BP control, and adherence to the SMBP component of interventions.

Studies were classified according to whom the intervention was aimed at (patients and/or healthcare professionals (HCPs)), and any cointerventions beyond SMBP.

Data extraction and risk of bias assessment were carried out independently by 2 reviewers (B.F., J.H.B.). Following guidance from the Cochrane Collaboration, studies were deemed to be at high, low, or unclear risk of bias based the following factors: random sequence generation, allocation concealment, blinding of outcome assessment, selective reporting, and attrition.<sup>12</sup> Risk of bias across studies was assessed using a Funnel plot and Egger's test.

### Statistical analysis

Meta-analyses were performed with RevMan 5 using random-effect models for a comparison of SMBP vs. usual care/control for medication adherence and BP outcomes. Meta-analysis was not undertaken for lifestyle factor outcomes due to insufficient data. As medication adherence was measured in different ways, standardized mean differences (SMD) were calculated in order to compare adherence across studies. Subgroup analyses were used to group studies that measured medication adherence by type of measurement. Where studies reported a number of adherence measures, the most objective measure was used. Meta-regression explored the association between BP change and medication adherence.

For office systolic blood pressure (SBP) and diastolic blood pressure (DBP), weighted mean differences were calculated for overall change between intervention and control.<sup>12</sup> Weighting depended on the SD of the change in BP from baseline to final reading. Where no such data were available, the SD for mean change was imputed.<sup>12</sup>

The  $I^2$  statistic was used to present statistical heterogeneity for all meta-analyses.

## RESULTS

### Included studies

Twenty-eight trials with a total of 7,021 participants fulfilled the inclusion criteria (Figure 1).<sup>13–40</sup> Medication adherence was assessed in 25 trials (89%) dietary outcomes in 8 (29%), physical activity in 6 (21%), and medication persistence in 1 (4%). BP was also assessed in 26 (93%) studies.

Characteristics of included studies are summarized in Table 1. SMBP was the sole component of interventions in 11 studies (39%) and combined with cointerventions in 17 (61%). Cointerventions were coded and grouped using *a priori* categories and are summarized in Table 1, and in more detail in the Supplementary Appendix S2. The most common cointervention was education delivered either verbally (in 11 studies) or using either printed or online materials (in 6 studies).

SMBP interventions may target behavior change in patients (i.e., improving treatment adherence, self-titration of medication, etc.). Equally, SMBP interventions can target behavior change in HCPs (i.e., medication prescribing, overcoming clinical inertia). Patients alone were the target of the intervention in 8 studies, while interventions targeted both patients and HCPs in the remaining 20. In the majority of cases where both patients and clinicians were targeted, intervention participants' general practitioners (GPs, family physicians) received self-measured BP results from participants, or were informed when patients exceeded target BP, and were able to act accordingly.<sup>13,14,18,22,27–31,34,37,40</sup> Three studies involved pharmacists implementing the intervention, 2 involved nurses, and 1 involved dieticians. The theoretical basis for the development of the intervention was reported in only 4 studies.<sup>19,30,33,35</sup>

Participants were initiated on new antihypertensive medications in 4 studies,<sup>16,25,37,38</sup> and medication titration protocols based on self-measured BP were reported in 5.<sup>16,24,35,37,40</sup>

Protocols for self-monitoring varied across studies, ranging from participants being asked to measure their BP twice daily every day,<sup>23</sup> to monthly.<sup>27</sup> The SMBP protocol was not reported in 5 studies.<sup>14,16,26,32,36</sup>

Follow-up ranged from 2 weeks to 12 months with a median of 6 months, and was deemed to be adequate (i.e., >80% of participants available for outcome assessment at follow-up) in 75% of studies.

### Risk of bias

Two studies were judged to be at low risk of bias;<sup>24,35</sup> 12 studies were judged to be at high risk of bias in at least

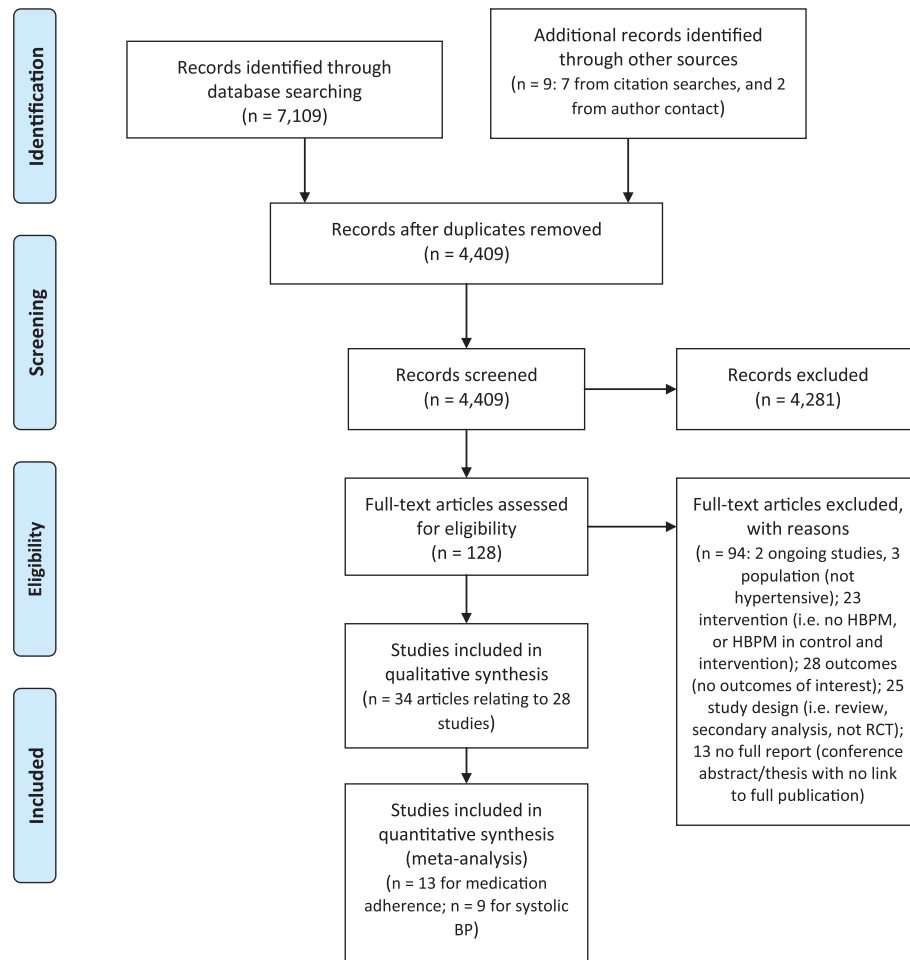

**Figure 1.** PRISMA (Preferred Reporting Items for Systematic Reviews and Meta-Analyses) flow diagram.

1 domain.<sup>14,17,21,22,27,29–31,33,34,36,38</sup> Results were unclear for the remaining 14 studies, most commonly due to lack of detail regarding allocation concealment. Risk of bias for each domain in each included study is presented in Figure 2.

### Adherence and persistence to antihypertensive medication

Adherence to antihypertensive medication was assessed by electronic monitoring in 5 studies, by pill count in 8, using pharmacy fill data in 6, and by self-report in 9. Three trials used 2 categories of measure.<sup>23,36,37</sup> Full results of medication adherence are presented in Table 2.

Pooled analysis of all adherence measures demonstrated a small but significant overall effect in favor of SMBP (SMD 0.21, 95% CI 0.08, 0.34; 13 studies), with moderate heterogeneity ( $I^2 = 43\%$ ) (Figure 3). A test for subgroup differences did not suggest a significant association between adherence measures and overall effect size ( $\chi^2 = 5.47$ ,  $df = 3$ ,  $P = 0.14$ ). We carried out a sensitivity analysis removing self-reported measures from the meta-analysis, and this had a small impact on the overall effect: SMD 0.27 (95% CI 0.11–0.34), compared to 0.21 (95% CI 0.08–0.44); with a small increase in heterogeneity:  $I^2$  46% compared to 43%.

When assessed by electronic monitoring (i.e., medication event monitoring systems), the pooled result of 2 studies detected a significant effect in favor of the intervention (SMD 0.45, 95% CI 0.10–0.79), with moderate statistical heterogeneity ( $I^2 = 59\%$ ). The pooled result of 5 studies where adherence was assessed by pill counts showed a small significant effect size in favor of the intervention (SMD 0.30, 95% CI 0.01–0.59), with moderate statistical heterogeneity ( $I^2 = 42\%$ ).

Assessment of adherence using pharmacy fill data (2 studies) and self-report (4 studies) showed no significant effect in favor of the intervention (SMD 0.12, 95% CI –0.05 to 0.29 and SMD 0.05, 95% CI –0.13 to 0.22, respectively), with low statistical heterogeneity in both cases ( $I^2 = 0\%$ ). Medication persistence was assessed in 1 study.<sup>16</sup> No significant effect in favor of SMBP was found in the proportions not discontinuing their medication by the end of the trial (9 months).

Rates of adherence in the included randomized controlled trials tended to be high, e.g., >97%,<sup>21</sup> >93%,<sup>26</sup> 90%,<sup>37</sup> and >88%.<sup>13</sup>

### Lifestyle factors: diet and physical activity

Diet and physical activity outcomes are presented in Table 3.

**Table 1.** Characteristics of included studies

| Study id, Country                             | Number of participants | Study arms included in review                                                                                                                    | Follow-up                           | SMBP protocol                                                                    | Target <sup>a</sup> | Age     | % Female | Outcomes <sup>b</sup> |
|-----------------------------------------------|------------------------|--------------------------------------------------------------------------------------------------------------------------------------------------|-------------------------------------|----------------------------------------------------------------------------------|---------------------|---------|----------|-----------------------|
| Bailey, <sup>13</sup> Australia               | 62                     | (i) SMBP<br>(ii) Usual care                                                                                                                      | 8 weeks<br>(2 months)               | Sitting twice daily (AM and PM)                                                  | P + HCP             | 55      | 54       | MA, BP, AI            |
| Bove, <sup>14</sup> USA                       | 241                    | (i) SMBP, telemedicine, and education (print/<br>online materials)<br>(ii) Usual care                                                            | 6 months                            | Unclear                                                                          | P + HCP             | 60      | 65       | MA, BP                |
| De Souza, <sup>15</sup> Brazil                | 57                     | (i) SMBP<br>(ii) Usual care                                                                                                                      | 6 and 12 months                     | At least twice a week, at random<br>times and quiet place                        | P                   | 60      | NR       | MA, D, PA, BP         |
| Düsing, <sup>16</sup> Germany/<br>Switzerland | 206                    | (i) SMBP, education (print/online materials),<br>medication titration protocol, adherence<br>reminders, and physicians education<br>(ii) Control | 34 weeks<br>(9 months)              | Unclear                                                                          | P + HCP             | 51      | 46       | MA/M, BP              |
| Fikri-Benbrahim, <sup>17</sup><br>Spain       | 180                    | (i) SMBP, education (verbal), and education (print/<br>online materials)<br>(ii) Usual care                                                      | 6 months                            | At least 1 day per week, on 2<br>occasions measure BP over 5<br>consecutive days | P + HCP             | 62      | 63       | MA, BP, AI            |
| Friedman, <sup>18</sup> USA                   | 299                    | (i) SMBP and telemedicine<br>(ii) Usual care                                                                                                     | 6 months                            | Weekly                                                                           | P + HCP             | 77      | 77       | MA, BP                |
| Green, <sup>19</sup> USA                      | 101                    | (i) SMBP and education (verbal)<br>(ii) Usual care                                                                                               | 6 months                            | 3 days per week                                                                  | P + HCP             | 57      | 42       | MA, D, PA, BP         |
| Haynes, <sup>20</sup> Canada                  | 39                     | (i) SMBP and education (verbal)<br>(ii) Control (no intervention)                                                                                | 6 months                            | Daily                                                                            | P                   | NR      | 0        | MA, BP                |
| Hosseini-nasab, <sup>21</sup> Iran            | 196                    | (i) SMBP<br>(ii) Usual care                                                                                                                      | 4, 12, 24 weeks<br>(1, 3, 6 months) | Daily                                                                            | P                   | 59      | 61       | MA, BP                |
| Johnson, <sup>22</sup> Canada                 | 136                    | (i) SMBP<br>(ii) Control (no intervention)                                                                                                       | 6 months                            | Daily                                                                            | P + HCP             | 53      | 40       | MA, BP, AI            |
| Kirscht, <sup>23</sup> USA                    | 417                    | (i) SMBP<br>(ii) Control (no intervention)                                                                                                       | 2 weeks                             | Twice daily                                                                      | P                   | 78% >50 | NR       | MA, D                 |
| Magid, <sup>24</sup> USA                      | 338                    | (i) SMBP, telemedicine, education (verbal), and<br>medication titration protocol<br>(ii) Usual care                                              | 6 months                            | 3–4 times weekly                                                                 | P + HCP             | 66      | 35       | MA, BP, AI            |
| Marquez-Contreras, <sup>25</sup><br>Spain     | 200                    | (i) SMBP<br>(ii) Usual care                                                                                                                      | 6 months                            | 3 days a week, twice AM, twice PM                                                | P                   | 59      | 49       | MA, BP                |
| McKenney, <sup>26</sup> USA                   | 70                     | (i) SMBP<br>(ii) Control (no intervention)                                                                                                       | 12 weeks<br>(3 months)              | Unclear                                                                          | P                   | 75      | 59       | MA, BP                |
| McManus, <sup>27</sup> UK                     | 441                    | (i) SMBP<br>(ii) Usual care                                                                                                                      | 6 and 12 months                     | Monthly                                                                          | P + HCP             | 63      | 53       | D, PA, BP             |
| Mehos, <sup>28</sup> USA                      | 41                     | (i) SMBP<br>(ii) Control (no intervention)                                                                                                       | 6 months                            | Daily in morning                                                                 | P + HCP             | 42% >50 | 70       | MA, BP, AI            |
| Midanik, <sup>29</sup> USA                    | 204                    | (i) SMBP<br>(ii) Usual care                                                                                                                      | 12 months                           | Twice weekly                                                                     | P + HCP             | 47      | 53       | D, PA, BP, AI         |
| Migneault, <sup>30</sup> USA                  | 337                    | (i) SMBP, telemedicine and education (verbal)<br>(ii) Control (education only)                                                                   | 8 and 12 months                     | Weekly                                                                           | P + HCP             | 57      | 70       | MA, D, PA,<br>BP, AI  |

(Continued)

Table 1. Continued

| Study id, Country                        | Number of participants | Study arms included in review                                                                                         | Follow-up          | SMBP protocol                                                       | Target <sup>a</sup> | Age | % Female | Outcomes <sup>b</sup> |
|------------------------------------------|------------------------|-----------------------------------------------------------------------------------------------------------------------|--------------------|---------------------------------------------------------------------|---------------------|-----|----------|-----------------------|
| Niiranen, <sup>31</sup> Finland          | 229                    | (i) SMBP and education (verbal)<br>(ii) Control (no intervention)                                                     | 12 months          | Four times per year, twice in AM on 4 consecutive days              | P + HCP             | 38  | 55       | D, PA, BP, AI         |
| Ogbuokiri, <sup>32</sup> Nigeria         | 29                     | (i) SMBP<br>(ii) Control (no intervention)                                                                            | 5 months           | Unclear                                                             | P                   | 47  | 85       | MA, BP                |
| Ogedegbe, <sup>33</sup> USA              | 1,039                  | (i) SMBP, education (verbal), education (print/online materials) and physician education<br>(ii) Usual care           | 6 and 12 months    | Twice daily, 3 times per week                                       | P + HCP             | 56  | 72       | MA, BP, AI            |
| Rinfret, <sup>34</sup> Canada            | 223                    | (i) SMBP, telemedicine and education (print/online materials)<br>(ii) Usual care                                      | 12 months          | Weekly                                                              | P + HCP             | 56  | 46       | MA, BP                |
| Rudd, <sup>35</sup> USA                  | 150                    | (i) SMBP, education (verbal), education (print/online materials) and medication titration protocol<br>(ii) Usual care | 6 months           | Twice daily                                                         | P + HCP             | 60  | 53       | MA, BP                |
| Stewart, <sup>36</sup> Australia         | 395                    | (i) SMBP, education (verbal) and adherence reminders<br>(ii) Usual care                                               | 6 months           | Unclear                                                             | P + HCP             | 67  | 49       | MA, BP                |
| Van Onzenoort, <sup>37</sup> Netherlands | 430                    | (i) SMBP and medication titration protocol<br>(ii) Control (office measures)                                          | 12 months          | Monthly (before study visit), 7 consecutive days, 3 times AM and PM | P + HCP             | 55  | 45       | MA, BP, AI            |
| Vrijens, <sup>38</sup> Belgium           | 628                    | (i) SMBP and education (verbal)<br>(ii) Control (no intervention)                                                     | 6 weeks            | Daily in AM                                                         | P                   | NR  | NR       | MA                    |
| Wakefield, <sup>39</sup> USA             | 302                    | (i) SMBP, telemedicine, education (print/online materials)<br>(ii) Usual care                                         | 6 and 12 months    | Daily                                                               | P + HCP             | 67  | 2        | MA, BP, AI            |
| Zarnke, <sup>40</sup> Canada             | 31                     | (i) SMBP and medication titration protocol<br>(ii) Usual care                                                         | 8 weeks (2 months) | Twice daily                                                         | P + HCP             | 55  | 65       | MA, D, BP             |

Abbreviation: SMBP, self-monitoring of blood pressure.

<sup>a</sup>Target of intervention: P = patient only; P + HCP = patient and healthcare professional.

<sup>b</sup>Outcomes: MA = medication adherence; MP = medication persistence; PA = physical activity; D = diet; BP = blood pressure; AI = adherence to intervention.

|                        | Random sequence generation (selection bias) | Allocation concealment (selection bias) | Blinding of outcome assessment (detection bias) | Selective reporting (reporting bias) | Incomplete outcome data (attrition bias) |
|------------------------|---------------------------------------------|-----------------------------------------|-------------------------------------------------|--------------------------------------|------------------------------------------|
| Bailey 1999            | ?                                           | ?                                       | ?                                               | +                                    | +                                        |
| Bove 2013              | +                                           | ?                                       | ?                                               | +                                    | +                                        |
| de Souza 2012          | ?                                           | ?                                       | ?                                               | +                                    | +                                        |
| Dusing 2009            | ?                                           | ?                                       | ?                                               | +                                    | +                                        |
| Fikri-Benbrahim 2013   | +                                           | +                                       | ?                                               | +                                    | +                                        |
| Friedman 1996          | ?                                           | +                                       | +                                               | +                                    | +                                        |
| Green 2014             | +                                           | ?                                       | ?                                               | +                                    | +                                        |
| Haynes 1976            | ?                                           | ?                                       | +                                               | ?                                    | ?                                        |
| Hosseininassab 2014    | ?                                           | +                                       | ?                                               | +                                    | +                                        |
| Johnson 1978           | ?                                           | ?                                       | +                                               | +                                    | +                                        |
| Kirscht 1981           | ?                                           | ?                                       | ?                                               | +                                    | ?                                        |
| Magid 2011             | +                                           | +                                       | +                                               | +                                    | +                                        |
| Marquez-Contreras 2006 | +                                           | +                                       | ?                                               | +                                    | +                                        |
| McKenney 1992          | ?                                           | ?                                       | +                                               | +                                    | +                                        |
| McManus 2005           | +                                           | +                                       | +                                               | +                                    | +                                        |
| Mehos 2000             | +                                           | ?                                       | ?                                               | +                                    | +                                        |
| Midanik 1991           | ?                                           | ?                                       | ?                                               | +                                    | +                                        |
| Migneault 2012         | +                                           | +                                       | +                                               | +                                    | +                                        |
| Niiranen 2014          | +                                           | ?                                       | +                                               | +                                    | +                                        |
| Ogbuokiri 1980         | +                                           | ?                                       | ?                                               | +                                    | +                                        |
| Ogedegbe 2014          | ?                                           | ?                                       | ?                                               | +                                    | +                                        |
| Rinfret 2009           | +                                           | +                                       | +                                               | +                                    | +                                        |
| Rudd 2004              | +                                           | +                                       | +                                               | +                                    | +                                        |
| Stewart 2014           | ?                                           | +                                       | +                                               | +                                    | +                                        |
| van Onzenoort 2010     | +                                           | ?                                       | +                                               | +                                    | +                                        |
| Vrijens 1997           | ?                                           | ?                                       | ?                                               | +                                    | ?                                        |
| Wakefield 2012         | ?                                           | +                                       | ?                                               | +                                    | +                                        |
| Zarnke 1997            | +                                           | ?                                       | ?                                               | +                                    | +                                        |

Figure 2. Risk of bias summary.

Dietary outcomes were reported by 8 studies: diet quality (3 studies), fruit and vegetables consumption (2 studies), coffee (1 study), and alcohol consumption (4 studies). One study reported a significant improvement in overall diet quality,<sup>30</sup> and another significant improvement in the average number of fruit and vegetables consumed<sup>19</sup>; the remaining results showed no effect.

Physical activity was measured in 6 studies; 1 of these showed an increase in mean energy expenditure,<sup>30</sup> but the other 5 were negative.<sup>15,19,27,29,31</sup>

### Blood pressure

Medication adherence and BP outcomes were measured together in 23 studies (all but<sup>23,27,29,31,38</sup>). In the 8 trials where SMBP had a significant effect on medication adherence, office DBP improved in 3 (38%).<sup>17,25,35</sup> Similarly, office SBP significantly improved in favor of the intervention in 3 of the 7 studies where adherence was significantly improved (43%).<sup>17,25,35</sup>

Interestingly office SBP significantly improved in 3 of 15 studies (20%) where SMBP interventions had no report effect on medication adherence,<sup>24,34,36</sup> as did office DBP in 2 of 14 studies (14%).<sup>28,34</sup>

Figure 4 shows the results of pooled analysis of DBP at 6 months, which demonstrate a significant overall effect in favor of SMBP (weighted mean differences -2.02, 95% CI -2.93, -1.11; 11 studies), with low heterogeneity ( $I^2 = 0\%$ ). A test for subgroup differences did not show a significant effect when studies were grouped according to whether medication adherence was improved or not ( $\chi^2 = 0.11$ ,  $df = 1$ ,  $P = 0.74$ ). Results for SBP at 6 months were similar. Full BP results are available in the [Supplementary Appendices S3, S4 and S5](#).

Exploratory meta-regression demonstrated a trend for an association between increased medication adherence and BP change (SBP and DBP); however, the results were not statistically significant, potentially due to the lack of sufficient studies.

### DISCUSSION

#### Main results and clinical implications

This review to our knowledge is the first to carry out a pooled analysis of the effect of SMBP interventions on medication adherence, and has shown a small but significant effect (SMD = 0.21 (95%CI 0.08–0.34)).<sup>41</sup>

A recent review estimated that 59% of people with hypertension had good adherence to medication, and that around 9% of cardiovascular events could be attributed to poor adherence to medication.<sup>42</sup> Another study estimated the reduction in healthcare costs potentially associated with increasing medication adherence in hypertension in 5 European countries.<sup>43</sup> In England, it was estimated that an increase in the proportion of patients adherent to treatment to 70% (i.e., 70% taking >80% of their medication), would lead to 6,553 fewer cardiovascular events, and savings of up to €36 billion over 10 years.<sup>43</sup> The costs of nonadherence to

**Table 2.** Effect of SMBP on medication adherence

| Study ID                                   | Description                                                                                                                                                                       | Follow-up      | Result                                                                                     |                                                                                           | Between group difference?                                                               |
|--------------------------------------------|-----------------------------------------------------------------------------------------------------------------------------------------------------------------------------------|----------------|--------------------------------------------------------------------------------------------|-------------------------------------------------------------------------------------------|-----------------------------------------------------------------------------------------|
|                                            |                                                                                                                                                                                   |                | Intervention                                                                               | Control                                                                                   |                                                                                         |
| <b>Outcome using electronic monitoring</b> |                                                                                                                                                                                   |                |                                                                                            |                                                                                           |                                                                                         |
| Düsing <sup>16</sup>                       | MEMS cap monitors time and date of opening pill bottle: (i) taking meds daily between 07:00 and 11:00, (ii) taking meds daily with no time restriction                            | 9 months       | (i) 57%<br>(ii) 86%                                                                        | (i) 54%<br>(ii) 77%                                                                       | (i) N (P value not reported)<br>(ii) N (P value not reported)                           |
| Marquez-Contreras <sup>25</sup>            | MEMS cap monitors. (i) Proportion of doses taken, (ii) proportion of correct days, (iii) correct time, and (iv) proportion of patients who were adherent (taking 80–100% of meds) | 6 months       | (i) 93.5% (SD 15.7)<br>(ii) 89.4% (SD 15.2)<br>(iii) 88.1% (SD 21.6)<br>(iv) 92% (SD 14.2) | (i) 87.7% (SD 23.6)<br>(ii) 83.7% (SD 23.3)<br>(iii) 79.9 (SD 28.2)<br>(iv) 74% (SD 18.2) | (i) Y (P = 0.0001)<br>(ii) Y (P = 0.0001)<br>(iii) Y (P = 0.006)<br>(iv) Y (P = 0.0007) |
| Rudd <sup>36</sup>                         | MEMS cap. Daily adherence is defined as the number of days where patients took the correct dose                                                                                   | 6 months       | 80.5 (SD 23.0)                                                                             | 62.9 (SD 31.1)                                                                            | Y (P = 0.03)                                                                            |
| Van Onzenoort <sup>37</sup>                | MEMS caps used in a single centre sub study: (i) proportion of days with correct dosing and (ii) proportion adequately adherent (>85%)                                            | 12 months      | (i) 92.3% (IQR 86.9–94.4)<br>(ii) 81%                                                      | (i) 90.9% (IQR 92.9–93.7)<br>(ii) 74%                                                     | (i) Y (P = 0.043)<br>(ii) N (P value not reported)                                      |
| Vrijens <sup>38</sup>                      | MEMS caps. Average number of pills taken in the last week of the study (maximum of 7)                                                                                             | 6 weeks        | 6.78                                                                                       | 6.20                                                                                      | N (P value not reported)                                                                |
| <b>Outcome using pill count</b>            |                                                                                                                                                                                   |                |                                                                                            |                                                                                           |                                                                                         |
| Bailey <sup>13</sup>                       | Proportion of available medication taken                                                                                                                                          | 2 months       | 88% (SD 27.4)                                                                              | 94% (SD 21.2)                                                                             | N (P value not reported)                                                                |
| Fikri-Benbrahim <sup>17</sup>              | Proportion adherent (taking 80–110% of available medication)                                                                                                                      | 6 months       | 96.5%                                                                                      | 85.4%                                                                                     | Y (P = 0.011)                                                                           |
| Friedman <sup>18</sup>                     | Mean change from baseline in proportion of available medication taken                                                                                                             | 6 months       | +2.4%                                                                                      | -0.4%                                                                                     | N (P = 0.29)                                                                            |
| Haynes <sup>20</sup>                       | Mean change from baseline in proportion of available medication taken                                                                                                             | 6 months       | +21.3% (SD 29.1)                                                                           | -1.5% (SD 33.1)                                                                           | Y (P = 0.025)                                                                           |
| Hosseinasab <sup>21</sup>                  | Proportion of available medication taken                                                                                                                                          | 1, 3, 6 months | 1 month: 99.6% (SD 3)<br>3 months: 98.9% (SD 5)<br>6 months: 99.0% (SD 5)                  | 1 month: 97.1% (SD 9)<br>3 months: 96.5% (SD 7)<br>6 months: 97.8% (SD 3)                 | Y (P = 0.01)<br>Y (P = 0.005)<br>Y (P = 0.04)                                           |
| Johnson <sup>22</sup>                      | (i) Mean change from baseline in adherence and adherence at follow-up, (ii) estimated by comparing pills on hand with pharmacy dispensing records                                 | 6 months       | (i) +11.8% (SD 31.5)<br>(ii) 78.0 (SD 31.5)                                                | (i) +1.0% (SD 40.8)<br>(ii) 68.5 (SD 42.6)                                                | (i) N (P value not reported)<br>(ii) N (P value not reported)                           |
| McKenney <sup>26</sup>                     | Overall study adherence                                                                                                                                                           | 3 months       | 100.2% (SD 7.0)                                                                            | 93.6% (SD 8.7)                                                                            | Y (P = 0.02)                                                                            |
| Van Onzenoort <sup>37</sup>                | Overall study adherence                                                                                                                                                           | 12 months      | 87.3%                                                                                      | 88.1%                                                                                     | N (P = 0.62)                                                                            |
| <b>Outcome using pharmacy fill</b>         |                                                                                                                                                                                   |                |                                                                                            |                                                                                           |                                                                                         |
| Kirsch <sup>23</sup>                       | Pharmacy data was used to estimate the doses of medication prescribed compared to doses dispensed                                                                                 | 2 weeks        | 66.5%                                                                                      | 66.5%                                                                                     | N (P value not)                                                                         |
| Magid <sup>24</sup>                        | Medication possession ratio (MPR) total number of days supplied for each medication, divided by period for which the medication was prescribed                                    | 6 months       | 0.85 (SD 0.19)                                                                             | 0.84 (SD 0.19)                                                                            | N (P = 0.88)                                                                            |

(Continued)

Table 2. Continued

| Study ID                  | Description                                                                                                                                                                                                       | Follow-up       | Result                                                                                              |                                                                                                    |                                                                                                                     |
|---------------------------|-------------------------------------------------------------------------------------------------------------------------------------------------------------------------------------------------------------------|-----------------|-----------------------------------------------------------------------------------------------------|----------------------------------------------------------------------------------------------------|---------------------------------------------------------------------------------------------------------------------|
|                           |                                                                                                                                                                                                                   |                 | Intervention                                                                                        | Control                                                                                            | Between group difference?                                                                                           |
| Mehos <sup>28</sup>       | Overall study compliance (no. tablets refilled/ amount prescribed)                                                                                                                                                | 6 months        | 82%                                                                                                 |                                                                                                    | 89%<br>N (P = 0.29)                                                                                                 |
| Ogbuokiri <sup>32</sup>   | Frequency of refill. Value arbitrarily chosen and defined prestudy (refill within 1–10 days of refill date = 100%; within 2 weeks = 50%; within 4 weeks = 25%)                                                    | 5 months        | 72.6%                                                                                               |                                                                                                    | NA                                                                                                                  |
| Rinfret <sup>34</sup>     | (i) Continuous medication availability (CMA) and (ii) continuous medication gaps (CMG) scores, which estimate the proportion of time the subjects have or do not have medication available                        | 12 months       | (i) 0.95 (IQR 0.76 to 1.00)<br>(ii) 0.04 (IQR 0.00–0.19)                                            | (i) 0.91 (IQR 0.54–1.04)<br>(ii) 0.09 (IQR 0.00–0.38)                                              | (i) N (P = 0.07)<br>(ii) N (P = 0.12)                                                                               |
| Stewart <sup>36</sup>     | Follow-up mean and mean change from baseline in: (i, ii) Medindex score (100 = perfect adherence); (iii, iv) Medication Possession Ratio                                                                          | 6 months        | (i) 84.75 (SD 17.13)<br>(ii) +4.60<br>(iii) 0.94 (SD 0.35)<br>(iv) +0.13                            | (i) 82.86 (SD 19.42)<br>(ii) +2.44<br>(iii) 0.89 (SD 0.21)<br>(iv) +0.08                           | (i) NR<br>(ii) N (P = 0.228)<br>(iii) NR<br>(iv) N (P = 0.496)                                                      |
| Outcome using self-report |                                                                                                                                                                                                                   |                 |                                                                                                     |                                                                                                    |                                                                                                                     |
| Bove <sup>13</sup>        | Medication adherence self-efficacy scale (MASES). Four-item scale, higher scores indicate greater level of adherence                                                                                              | 6 months        | 3.56 (SD 0.81)                                                                                      | 3.59 (SD 0.85)                                                                                     | N (P = 0.86)                                                                                                        |
| De Souza <sup>15</sup>    | Proportion of patients who reported “regular use daily” of antihypertensive medication                                                                                                                            | 6 and 12 months | 6 months: 94.7%<br>12 months: 100%                                                                  | 6 months: 83.3%<br>12 months: 88.2%                                                                | 6 months: N (P = 0.150)<br>12 months: Y (P = 0.031)                                                                 |
| Green <sup>19</sup>       | Mean change from baseline in Morisky 8-item score. Higher score indicates lower adherence                                                                                                                         | 6 months        | -0.1 (SD 2.0)                                                                                       | -0.2 (SD 1.9)                                                                                      | N (P = 0.79)                                                                                                        |
| Kirscht <sup>23</sup>     | Patients were asked about pill taking behaviour and were ranked on an ordinal scale                                                                                                                               | 2 weeks         | 94.4%                                                                                               | 94.3%                                                                                              | N (P value not reported)                                                                                            |
| Migneault <sup>30</sup>   | Mean change from baseline in Morisky 7 score. Higher scores indicate better adherence                                                                                                                             | 8 months        | +0.45                                                                                               | +0.26                                                                                              | N (P value not reported)                                                                                            |
| Ogedegbe <sup>33</sup>    | Mean change in Morisky 4-item score. Higher score indicates poor adherence                                                                                                                                        | 6 and 12 months | 6 months: -0.14<br>12 months: -0.24                                                                 | 6 months: -0.13<br>12 months: -0.20                                                                | 6 months: N (P = 0.87)<br>12 months: N (P = 0.71)                                                                   |
| Stewart <sup>36</sup>     | (i, ii) Follow-up mean and mean change from baseline in proportion adherent using Morisky 4; (iii, iv) Morisky 4 score (0 = good adherence); (v, vi) TABS differential (>15 = good adherence)                     | 6 months        | (i) 73.5%<br>(ii) +13.5%<br>(iii) 0.36 (SD 0.67)<br>(iv) -0.20<br>(v) 11.10 (SD 3.83)<br>(vi) +0.85 | (i) 63.6%<br>(ii) +6.4%<br>(iii) 0.44 (SD 0.64)<br>(iv) -0.15<br>(v) 11.59 (SD 3.33)<br>(vi) +0.67 | (i) N (P = 0.09)<br>(ii) N (P value not reported)<br>(iii) NR<br>(iv) N (P = 0.310)<br>(v) NR<br>(vi) N (P = 0.856) |
| Wakefield <sup>39</sup>   | Patients were asked, “are you taking your medications as prescribed”. Scores represent the proportion of medications for which responses agreed with the directions for use on the VA pharmacy medication profile | 6 and 12 months | 6 months: 99.8 (SD 1.4)<br>12 months: 99.7% (SD 1.4)                                                | 6 months: 99.6 (SD 2.2)<br>12 months: 98.9% (SD 6.0)                                               | 6 months: N (P = 0.79)<br>12 months: N (P = 0.20)                                                                   |
| Zarnke <sup>40</sup>      | Mean number of self-reported doses missed per week                                                                                                                                                                | 2 months        | 0.05 (SD 0.2)                                                                                       | 0.2 (SD 0.4)                                                                                       | N (P value not reported)                                                                                            |

Abbreviation: SMBP, self-monitoring of blood pressure; MEMS, medication event monitoring system; IQR, interquartile range; NR, not reported; VA, Veterans Affairs.



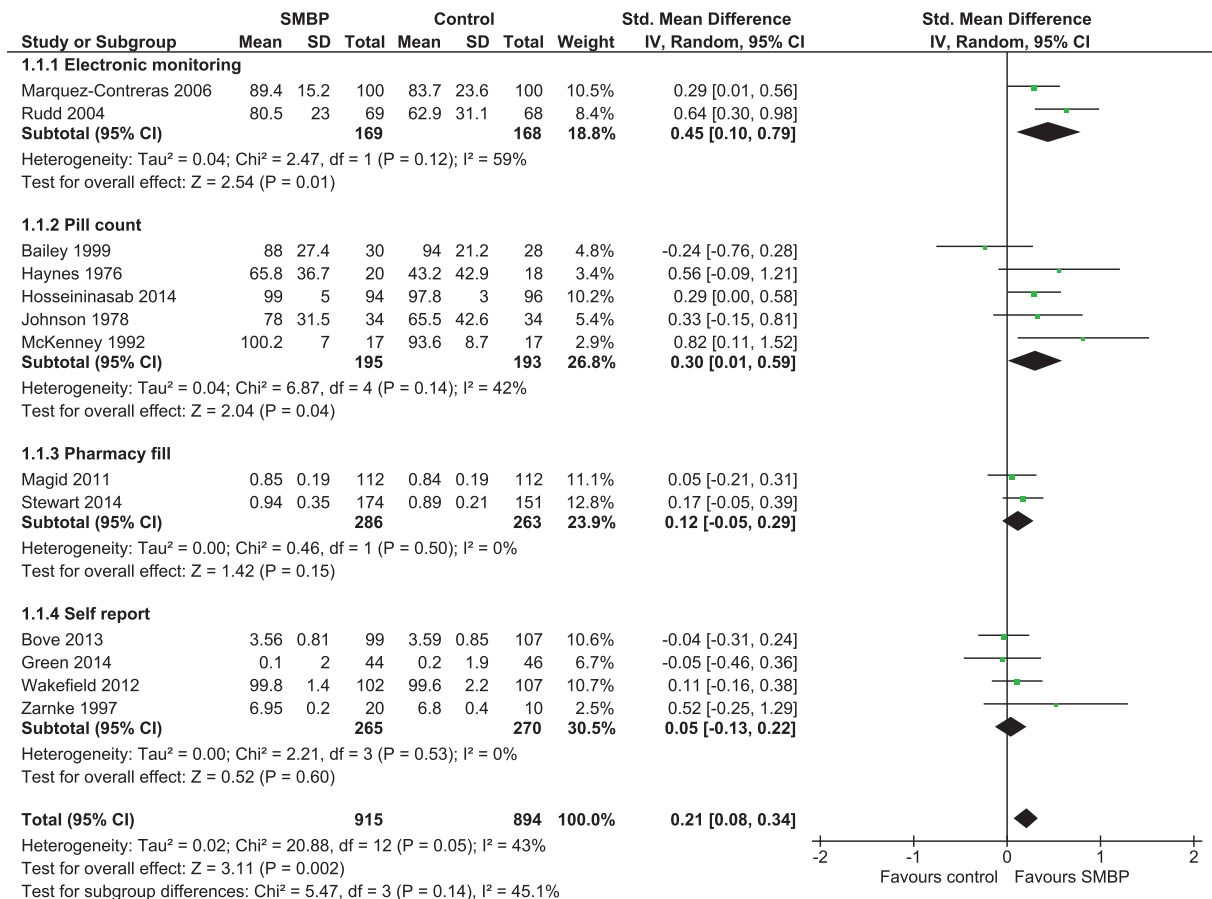

**Figure 3.** Self-monitoring of blood pressure interventions vs. controls for antihypertensive medication adherence.

antihypertensives in the United States has been estimated to be as much as \$105 billion annually.<sup>44</sup>

Only one study in the review included evidence on medication persistence. Helping patients take their medication correctly on a day-to-day basis is important (adherence), but in conditions that require long-term treatment such as hypertension, making sure patients keep taking the medication over time (persistence) is of equal if not greater importance. Meta-analysis shows that the effect of antihypertensive treatment is apparent within a year and ongoing risk reduction is dependent on ongoing treatment.<sup>45</sup>

Importantly, studies using more objective measures of medication adherence showed a greater effect size in favor of intervention. The pooled estimate when electronic monitoring was used was almost double the overall estimate, and approaching 10 times larger than the estimate from studies where the least objective self-reported measures were used. Objective measurement may remove the measurement noise associated with self-report, therefore making more precise estimates of adherence possible hence easier differentiation between low and high adherence.

While SMBP has been shown to improve medication adherence, the results of this review do not provide evidence that this explains all of the observed BP reduction. Further research is needed to clarify whether this is because the effect of SMBP is not mediated by medication adherence, or due to methodological issues such as the sensitivity

of outcome measures and use of cointerventions targeting other behaviors.

There is insufficient evidence from randomized controlled trials testing the effect of SMBP on lifestyle factors to be able to draw any conclusions about the extent to which they may mediate the effect of SMBP.

### Comparison to the literature

The effect of SMBP on medication adherence shown in this review compares favorably with other interventions aimed at improving adherence. Evidence from a review of interventions to improve medication adherence in hypertensives carried out in 2004 showed a small and nonsignificant overall effect, SMD = 0.12 (95% CI -0.06 to 0.28).<sup>46</sup> A meta-analysis of trials to improve medication adherence in one condition reported a small but significant effect, SMD = 0.08 (95% CI 0.04–0.12).<sup>47</sup>

### Strengths and weaknesses

This review used a comprehensive search strategy and captured more than double the number of studies compared to previously.<sup>7</sup> Sufficient data were available to perform meta-analysis for medication adherence allowing estimation of the effect size.

**Table 3** Effect of SMBP on lifestyle factor outcomes

| Study i.d.                    | Outcome measure                                                                                                                                                                                                            | Results         |                                                                                                                                                        |                                                                                                                                  |                                                                                                                           | Difference between groups? |
|-------------------------------|----------------------------------------------------------------------------------------------------------------------------------------------------------------------------------------------------------------------------|-----------------|--------------------------------------------------------------------------------------------------------------------------------------------------------|----------------------------------------------------------------------------------------------------------------------------------|---------------------------------------------------------------------------------------------------------------------------|----------------------------|
|                               |                                                                                                                                                                                                                            | Follow-up       | Intervention                                                                                                                                           | Control                                                                                                                          |                                                                                                                           |                            |
| <b>Medication persistence</b> |                                                                                                                                                                                                                            |                 |                                                                                                                                                        |                                                                                                                                  |                                                                                                                           |                            |
| Düsing <sup>16</sup>          | Proportion not discontinuing medication by end of trial                                                                                                                                                                    | 9 months        | 95.9%                                                                                                                                                  | 88.3%                                                                                                                            | N (P value not reported)                                                                                                  |                            |
| <b>Diet</b>                   |                                                                                                                                                                                                                            |                 |                                                                                                                                                        |                                                                                                                                  |                                                                                                                           |                            |
| De Souza <sup>15</sup>        | Proportion reporting food intake according to dietary guidelines                                                                                                                                                           | 6 and 12 months | 6 months: 97.4%<br>12 months: 97.3%                                                                                                                    | 6 months: 88.9%<br>12 months: 100%                                                                                               | 6 months: N (P = 0.21)<br>12 months: N (P = 0.68)                                                                         |                            |
| Green <sup>19</sup>           | Mean change from baseline in average number of daily servings of fruit and vegetables                                                                                                                                      | 6 months        | +2.3 (SD 3.0)                                                                                                                                          | +0.0 (SD 1.9)                                                                                                                    | Y (P < 0.01)                                                                                                              |                            |
| Kirscht <sup>23</sup>         | Proportion adherent to dietary recommendations                                                                                                                                                                             | 2 weeks         | 75.2%                                                                                                                                                  | 77.2%                                                                                                                            | N (P value not reported)                                                                                                  |                            |
| McManus <sup>27</sup>         | Mean change from baseline in: (i) proportion adding salt to food and (ii) proportion drinking more than recommendations (men >21; women >14 units/week)                                                                    | 6 and 12 months | 6 months: (i) -2%, (ii) -8%<br>12 months: (i) -4%, (ii) -6%                                                                                            | 6 months: (i) -2%, (ii) -3%<br>12 months: (i) +3%, (ii) -2%                                                                      | 6 months: (i) N (P = 0.82), (ii) N (P = 0.11)<br>12 months: (i) Y (P = 0.03), (ii) N (P = 0.56)                           |                            |
| Midanik <sup>29</sup>         | (i) Mean change in alcohol consumption (drinks per day) and (ii) coffee consumption (drinks per day)                                                                                                                       | 12 months       | (i) -0.2 (SD 0.9)<br>(ii) -0.1 (SD 1.4)                                                                                                                | (i) -0.2 (SD 0.8)<br>(ii) -0.5 (SD 1.4)                                                                                          | (i) N (P = 0.87)<br>(ii) N (P = 0.05)                                                                                     |                            |
| Migneault <sup>30</sup>       | Mean change from baseline in overall diet quality score (higher score = healthier diet)                                                                                                                                    | 8 months        | +2.8                                                                                                                                                   | -0.74                                                                                                                            | Y (P < 0.05)                                                                                                              |                            |
| Niiranen <sup>31</sup>        | (i) Mean change from baseline in: alcohol intake (g/day); (ii) total energy intake (MJ/day); (iii) total carbohydrate (%MJ/day); (iv) total protein (%MJ/day); (v) total fat (%MJ/day); (vi) total saturated fat (%MJ/day) | 12 months       | (i) -0.1 (SD 8.2)<br>(ii) -0.3 (SD 1.8)<br>(iii) +1.5 (SD 6.3)<br>(iv) +0.0 (SD 6.7)<br>(v) +0.7 (SD 2.6)<br>(vi) -0.8 (SD 2.1)<br>(vii) -0.7 (SD 2.6) | (i) +3.2 (SD 16.5)<br>(ii) -0.1 (SD 1.3)<br>(iii) +0.0 (SD 6.7)<br>(iv) +0.7 (SD 2.6)<br>(v) -0.8 (SD 2.1)<br>(vi) -0.7 (SD 2.6) | (i) N (P = 0.06)<br>(ii) N (P = 0.37)<br>(iii) N (P = 0.10)<br>(iv) N (P = 0.12)<br>(v) N (P = 0.41)<br>(vi) N (P = 0.11) |                            |
| Zarnke <sup>40</sup>          | Mean change from baseline in alcohol intake (drinks per week)                                                                                                                                                              | 2 months        | -0.25 (SD 1.59)                                                                                                                                        | +0.10 (SD 0.4)                                                                                                                   | N (P value not reported)                                                                                                  |                            |
| <b>Physical activity</b>      |                                                                                                                                                                                                                            |                 |                                                                                                                                                        |                                                                                                                                  |                                                                                                                           |                            |
| De Souza <sup>15</sup>        | Proportion exercising more than 3 times weekly                                                                                                                                                                             | 6 and 12 months | 6 months: 67.6%<br>12 months: 67.6%                                                                                                                    | 6 months: 61.1%<br>12 months: 58.8%                                                                                              | 6 months: N (P = 0.22)<br>12 months: N (P = 0.19)                                                                         |                            |
| Green <sup>19</sup>           | Proportion at follow-up engaging in physical activity (often working up a sweat)                                                                                                                                           | 6 months        | 27.9% (SD 44.1)                                                                                                                                        | 20.5% (SD 40.2)                                                                                                                  | N (P = 0.40)                                                                                                              |                            |
| McManus <sup>27</sup>         | Mean change from baseline in proportion exercising more than 3 times weekly                                                                                                                                                | 6 and 12 months | 6 months: +9%<br>12 months: +4%                                                                                                                        | 6 months: +13%<br>12 months: +3%                                                                                                 | 6 months: N (P = 0.53)<br>12 months: N (P = 0.49)                                                                         |                            |
| Midanik <sup>29</sup>         | Physical activity at follow-up (*study reported no difference between groups, but reported no data)                                                                                                                        | 12 months       | Not reported                                                                                                                                           | Not reported                                                                                                                     | N (P value not reported)                                                                                                  |                            |
| Migneault <sup>30</sup>       | (i) Mean change from baseline in: moderate or greater intensity activity time (min/week), (ii) proportion exercising >150 min/week, and (iii) total energy expenditure (kcal/day)                                          | 8 months        | (i) -3.44, (ii) -2%, (iii) +43.8                                                                                                                       | (i) +2.77, (ii) +5%, (iii) -36.2                                                                                                 | (i) N (P value not reported), (ii) N (P value not reported), (iii) Y (P < 0.05)                                           |                            |
| Niiranen <sup>31</sup>        | Mean change from baseline in leisure activity (MJ/day)                                                                                                                                                                     | 12 months       | +0.00 (SD 0.4)                                                                                                                                         | +0.07 (SD 0.3)                                                                                                                   | N (P = 0.15)                                                                                                              |                            |

Abbreviation: SMBP, self-monitoring of blood pressure.

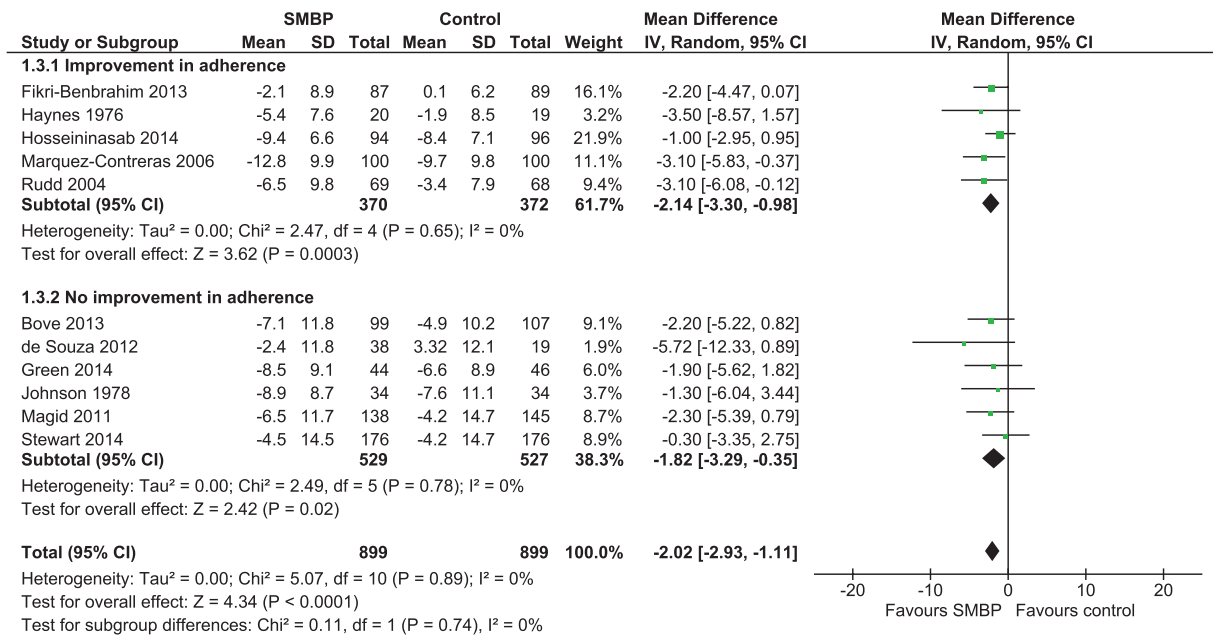

**Figure 4.** Self-monitoring of blood pressure interventions vs. controls for office diastolic blood pressure at 6 months.

Overall, the quantity and quality of evidence of the impact of SMBP on lifestyle factors was poor. Evidence for the effect of SMBP on diet and physical activity was available in only 9 studies, and where significant effects in favor of the intervention were found, few were clinically significant. UK guidance for the management of hypertension recommends that lifestyle advice should be offered to all people undergoing treatment for hypertension. SMBP could potentially act by helping hypertensives see the benefits of a healthier lifestyle, but more data are required before this can be substantiated.

The interventions tested were heterogeneous, with varying target population, SMBP protocol, medication titration protocol, and other cointerventions. Studies were often aimed at people with hypertension, but also required the input of HCPs to interpret the SMBP measurements and act accordingly. Using complex interventions and targeting both patients and HCPs together complicate the investigation of the independent effect of SMBP on patient behavior. Further work should specifically examine the effect of SMBP on physician behavior, e.g., prescribing, and the extent to which this could be a mediator.

The theoretical basis for intervention development only reported in 4 studies (14%). As SMBP interventions target behavior change in patients and/or HCPs, conceptual models are needed to provide a framework for the development of interventions. As it stands, it is difficult to understand how many SMBP interventions have been developed, e.g., the justification for the frequency of SMBP and what patients/HCPs are expected to do with these readings.

**CONCLUSIONS**

SMBP leads to an increase in medication adherence, and best seen in those studies where objective measures are used. However, to what extent medication adherence acts as a mediator of the effect of SMBP remains to be determined.

The role of lifestyle factors is less clear, and it is feasible and indeed likely, that other mediators may affect the outcomes of SMBP such as physician prescribing.

Furthermore, future trials should ideally use methods that allow for the potential incremental effects of cointerventions to be determined (e.g., using a multifactorial design). More transparency is needed in reporting the basis of the intervention development. SMBP improves adherence to medication as well as lowering BP, however a better understanding of the mediators of these effects is needed, in order to optimize SMBP interventions for translation to the “real-world”.

**SUPPLEMENTARY MATERIAL**

Supplementary materials are available at *American Journal of Hypertension* (<http://ajh.oxfordjournals.org>).

**ACKNOWLEDGMENTS**

R.J.M. has received research funding from Omron and Lloyds Pharmacies in terms of blood pressure monitoring equipment.

**DISCLOSURE**

B.R.F., J.H.B., and L.H. declare no conflicts of interest.

**REFERENCES**

1. Bray EP, Holder R, Mant J, McManus RJ. Does self-monitoring reduce blood pressure? Meta-analysis with meta-regression of randomized controlled trials. *Ann Med* 2010; 42:371–386.

2. Stergiou GS, Bliziotis IA. Home blood pressure monitoring in the diagnosis and treatment of hypertension: a systematic review. *Am J Hypertens* 2011; 24:123–134.
3. Uhlig K, Patel K, Ip S, Kitsios GD, Balk EM. Self-measured blood pressure monitoring in the management of hypertension: a systematic review and meta-analysis. *Ann Intern Med* 2013; 159:185–194.
4. Fischer M, Stedman M, Lii J, Vogeli C, Shrank W, Brookhart MA, Weissman J. Primary medication non-adherence: analysis of 195,930 electronic prescriptions. *J Gen Intern Med* 2010; 25:284–290.
5. Gwadry-Sridhar FH, Manias E, Lal L, Salas M, Hughes DA, Ratzki-Leewing A, Grubisic M. Impact of interventions on medication adherence and blood pressure control in patients with essential hypertension: a systematic review by the ISPOR medication adherence and persistence special interest group. *Value Health* 2013; 16:863–871.
6. Hedayati SS, Elsayed EF, Reilly RF. Non-pharmacological aspects of blood pressure management: what are the data? *Kidney Int* 2011; 79:1061–1070.
7. Ogedegbe G, Schoenthaler A. A systematic review of the effects of home blood pressure monitoring on medication adherence. *J Clin Hypertens* 2006; 8:174–180.
8. Abdullah A, Othman S. The influence of self-owned home blood pressure monitoring (HBPM) on primary care patients with hypertension: a qualitative study. *BMC Fam Pract* 2011; 12:143.
9. Saito I, Nomura M, Hirose H, Kawabe H. Use of home blood pressure monitoring and exercise, diet and medication compliance in Japan. *Clin Exp Hypertens* 2010; 32:210–213.
10. McManus RJ, Wilson S, Delaney BC, Fitzmaurice DA, Hyde CJ, Tobias RS, Jowett S, Hobbs FD. Review of the usefulness of contacting other experts when conducting a literature search for systematic reviews. *BMJ* 1998; 317:1562–1563.
11. Fletcher B, Hartmann-Boyce J, Roberts N, Hinton L, McManus RJ. Effect of home blood pressure monitoring on medication adherence, medication persistence and lifestyle factors in hypertensives: systematic review protocol, [http://www.crd.york.ac.uk/PROSPERO/display\\_record.asp?ID=CRD42014007567](http://www.crd.york.ac.uk/PROSPERO/display_record.asp?ID=CRD42014007567), 2014.
12. Higgins JPT, Green S. Cochrane Handbook for Systematic Reviews of Interventions [Version 5.0.2] The Cochrane Collaboration. [www.cochrane-handbook.org](http://www.cochrane-handbook.org), 2009.
13. Bailey B, Carney SL, Gillies AA, Smith AJ. Antihypertensive drug treatment: a comparison of usual care with self blood pressure measurement. *J Hum Hypertens* 1999; 13:147–150.
14. Bove AA, Homko CJ, Santamore WP, Kashem M, Kerper M, Elliott DJ. Managing hypertension in urban underserved subjects using telemedicine—a clinical trial. *Am Heart J* 2013; 165:615–621.
15. De Souza WKSB, Jardim PCBV, Brito LP, Araujo FA, Sousa ALL. Self measurement of blood pressure for control of blood pressure levels and adherence to treatment. *Arquivos Brasileiros de Cardiologia* 2012; 98:167–174.
16. Düsing R, Handrock R, Klebs S, Toussef E, Vrijens B. Impact of supportive measures on drug adherence in patients with essential hypertension treated with valsartan: the randomized, open-label, parallel group study VALIDATE. *J Hypertens* 2009; 27:894–901.
17. Fikri-Benbrahim N, Faus MJ, Martínez-Martínez F, Sabater-Hernández D. Impact of a community pharmacists' hypertension-care service on medication adherence. The AFenPA study. *Res Social Adm Pharm* 2013; 9:797–805.
18. Friedman RH, Kazis LE, Jette A, Smith MB, Stollerman J, Torgerson J, Carey K. A telecommunications system for monitoring and counseling patients with hypertension. Impact on medication adherence and blood pressure control. *Am J Hypertens* 1996; 9:285–292.
19. Green BB, Anderson ML, Cook AJ, Catz S, Fishman PA, McClure JB, Reid RJ. e-Care for heart wellness: a feasibility trial to decrease blood pressure and cardiovascular risk. *Am J Prev Med* 2014; 46:368–377.
20. Haynes RB, Sackett DL, Gibson ES, Taylor DW, Hackett BC, Roberts RS, Johnson AL. Improvement of medication compliance in uncontrolled hypertension. <http://onlinelibrary.wiley.com/doi/10.1002/147229/frames.html> 1976.
21. Hosseinasab M, Jahangard-Rafsanjani Z, Mohagheghi A, Sarayani A, Rashidian A, Javadi M, Ahmadvand A, Hadjibabaie M, Gholami K. Self-monitoring of blood pressure for improving adherence to antihypertensive medicines and blood pressure control: a randomized controlled trial. *Am J Hypertens* 2014; 27:1339–1345.
22. Johnson AL, Taylor DW, Sackett DL, Dunnett CD, Shimizu AG. Self-recording of blood pressure in the management of hypertension. *Can Med Assoc J* 1978; 119:1034–1039.
23. Kirscht JP, Kirscht JL, Rosenstock IM. A test of interventions to increase adherence to hypertensive medical regimens. <http://onlinelibrary.wiley.com/doi/10.1002/147229/frames.html> 1981.
24. Magid DJ, Ho PM, Olson KL, Brand DW, Welch LK, Snow KE, Lambert-Kerzner AC, Plomondon ME, Havranek EP. A multimodal blood pressure control intervention in 3 healthcare systems. *Am J Manag Care* 2011; 17:e96–103.
25. Márquez-Contreras E, Martell-Claros N, Gil-Guillén V, de la Figuera-Von Wichmann M, Casado-Martínez JJ, Martín-de Pablos JL, Figueras M, Galera J, Serra A; Compliance Group of the Spanish Society of Hypertension (SEE). Efficacy of a home blood pressure monitoring programme on therapeutic compliance in hypertension: the EAPACUM-HTA study. *J Hypertens* 2006; 24:169–175.
26. McKenney JM, Munroe WP, Wright JT Jr. Impact of an electronic medication compliance aid on long-term blood pressure control. *J Clin Pharmacol* 1992; 32:277–283.
27. McManus RJ, Mant J, Roalfe A, Oakes RA, Bryan S, Pattison HM, Hobbs FD. Targets and self monitoring in hypertension: randomised controlled trial and cost effectiveness analysis. *BMJ* 2005; 331:22.
28. Mehos BM, Saseen JJ, MacLaughlin EJ. Effect of pharmacist intervention and initiation of home blood pressure monitoring in patients with uncontrolled hypertension. *Pharmacoepidemiol Ther* 2000; 20:1384–1389.
29. Midanik LT, Resnick B, Hurley LB, Smith EJ, McCarthy M. Home blood pressure monitoring for mild hypertensives. *Public Health Rep* 1991; 106:85–89.
30. Migneault JP, Dedier JJ, Wright JA, Heeren T, Campbell MK, Morisky DE, Rudd P, Friedman RH. A culturally adapted telecommunication system to improve physical activity, diet quality, and medication adherence among hypertensive African-Americans: a randomized controlled trial. *Ann Behav Med* 2012; 43:62–73.
31. Niiranen TJ, Leino K, Puukka P, Kantola I, Karanko H, Jula AM. Lack of impact of a comprehensive intervention on hypertension in the primary care setting. *Am J Hypertens* 2014; 27:489–496.
32. Ogbuokiri JE. Self-monitoring of blood pressures in hypertensive subjects and its effects on patient compliance. *Drug Intell Clin Pharm* 1980; 14:424–427.
33. Ogedegbe G, Tobin JN, Fernandez S, Cassells A, Diaz-Gloster M, Khalida C, Pickering T, Schwartz J. Counseling African Americans to Control Hypertension: cluster-randomized clinical trial main effects. *Circulation* 2014; 129:2044–2051.
34. Rinfret S, Lussier MT, Peirce A, Duhamel F, Cossette S, Lalonde L, Tremblay C, Guertin MC, LeLorier J, Turgeon J, Hamet P; LOYAL Study Investigators. The impact of a multidisciplinary information technology-supported program on blood pressure control in primary care. *Circ Cardiovasc Qual Outcomes* 2009; 2:170–177.
35. Rudd P, Miller NH, Kaufman J, Kraemer HC, Bandura A, Greenwald G, Debusk RF. Nurse management for hypertension. A systems approach. *Am J Hypertens* 2004; 17:921–927.
36. Stewart K, Mc Namara KP, George J. Challenges in measuring medication adherence: experiences from a controlled trial. *Int J Clin Pharm* 2014; 36:15–19.
37. van Onzenoort HA, Verberk WJ, Kroon AA, Kessels AG, Nelemans PJ, van der Kuy PH, Neef C, de Leeuw PW. Effect of self-measurement of blood pressure on adherence to treatment in patients with mild-to-moderate hypertension. *J Hypertens* 2010; 28:622–627.
38. Vrijens B, Goetghebeur E. Comparing compliance patterns between randomized treatments. *Control Clin Trials* 1997; 18:187–203.
39. Wakefield BJ, Holman JE, Ray A, Scherubel M, Adams MR, Hills SL, Rosenthal GE. Outcomes of a home telehealth intervention for patients with diabetes and hypertension. *Telemed J E Health* 2012; 18:575–579.
40. Zarnke KB, Feagan BG, Mahon JL, Feldman RD. A randomized study comparing a patient-directed hypertension management strategy with usual office-based care. *Am J Hypertens* 1997; 10:58–67.
41. Cohen J (ed). *Statistical Power Analysis for the Behavioral Sciences*, 2nd edn. Hillsdale, NJ: Lawrence Erlbaum Associates, 1988.
42. Chowdhury R, Khan H, Heydon E, Shroufi A, Fahimi S, Moore C, Stricker B, Mendis S, Hofman A, Mant J, Franco OH. Adherence to cardiovascular therapy: a meta-analysis of prevalence and clinical consequences. *Eur Heart J* 2013; 34:2940–2948.
43. Mennini FS, Marcellusi A, von der Schulenburg JM, Gray A, Levy P, Sciattella P, Soro M, Staffiero G, Zeidler J, Maggioni A, Schmieder RE.

- Cost of poor adherence to anti-hypertensive therapy in five European countries. *Eur J Health Econ* 2014; 5:5.
44. Nasseh K, Glave Frazee S, Visaria J, Vlahiotis A, Tian Y. Cost of medication nonadherence associated with diabetes, hypertension, and dyslipidemia. *Am J Pharm Benefits* 2012; 4:e41–e47.
45. Law MR, Morris JK, Wald NJ. Use of blood pressure lowering drugs in the prevention of cardiovascular disease: meta-analysis of 147 randomised trials in the context of expectations from prospective epidemiological studies. *BMJ* 2009; 338:b1665.
46. Takiya LN, Peterson AM, Finley RS. Meta-analysis of interventions for medication adherence to antihypertensives. *Ann Pharmacother* 2004; 38:1617–1624.
47. Peterson AM, Takiya L, Finley R. Meta-analysis of trials of interventions to improve medication adherence. *Am J Health Syst Pharm* 2003; 60:657–665.
